# Supplementary material for: Mendelian randomization rules out the causal relationship between serum lipids and cholecystitis
Source: PubMed Central journal article supplement (PMC8447629; doi:10.1186/s12920-021-01082-y), 2021-09-17
Supplement: 12920_2021_1082_MOESM2_ESM.pdf [file 12920_2021_1082_MOESM2_ESM.pdf]

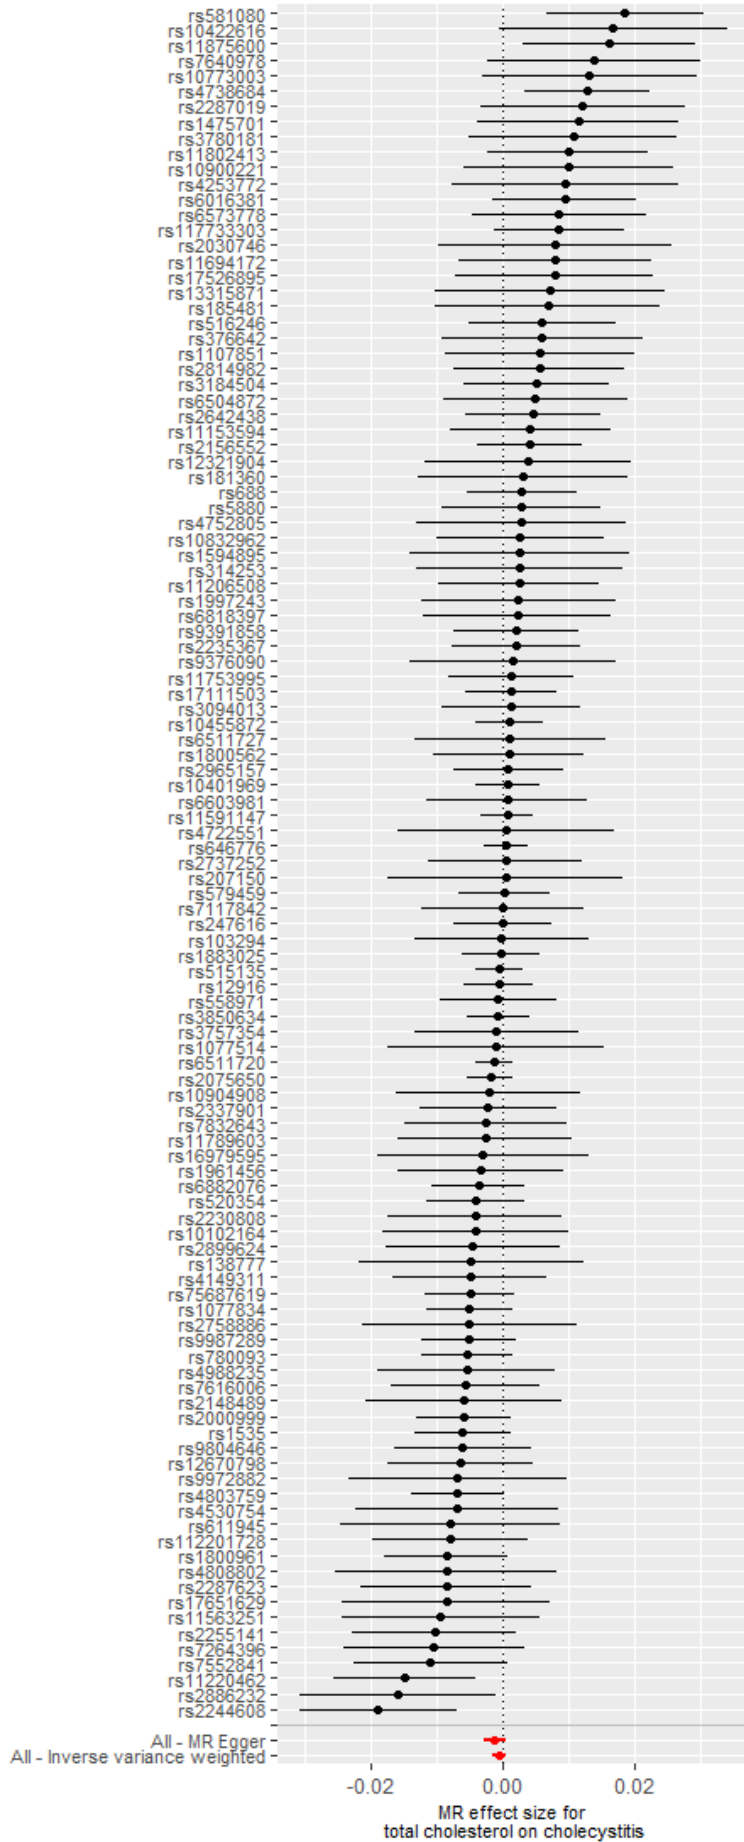

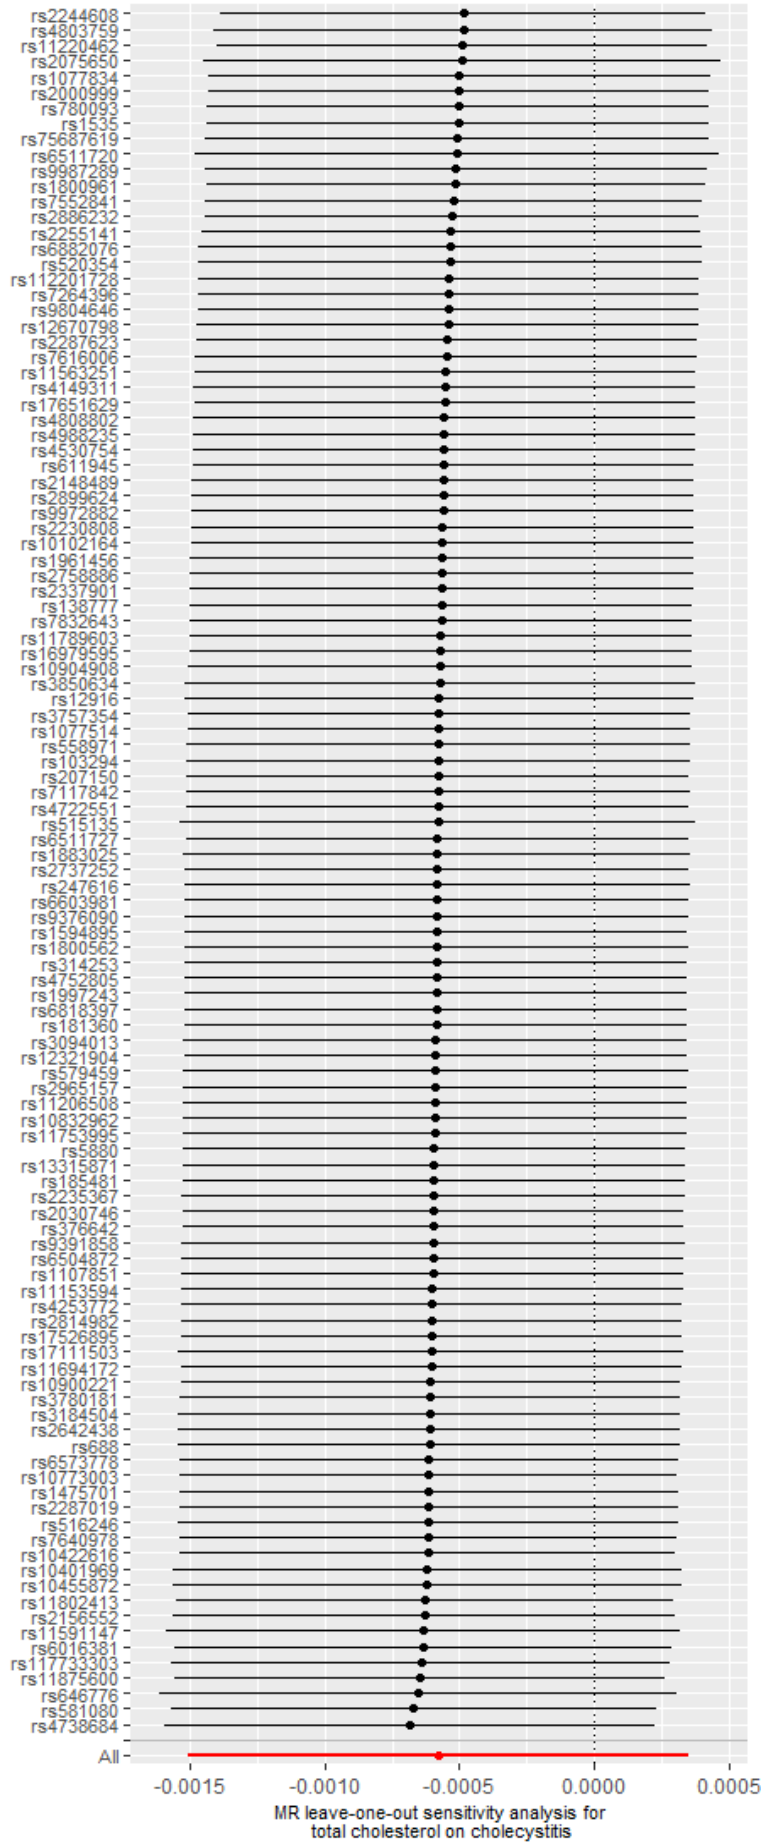

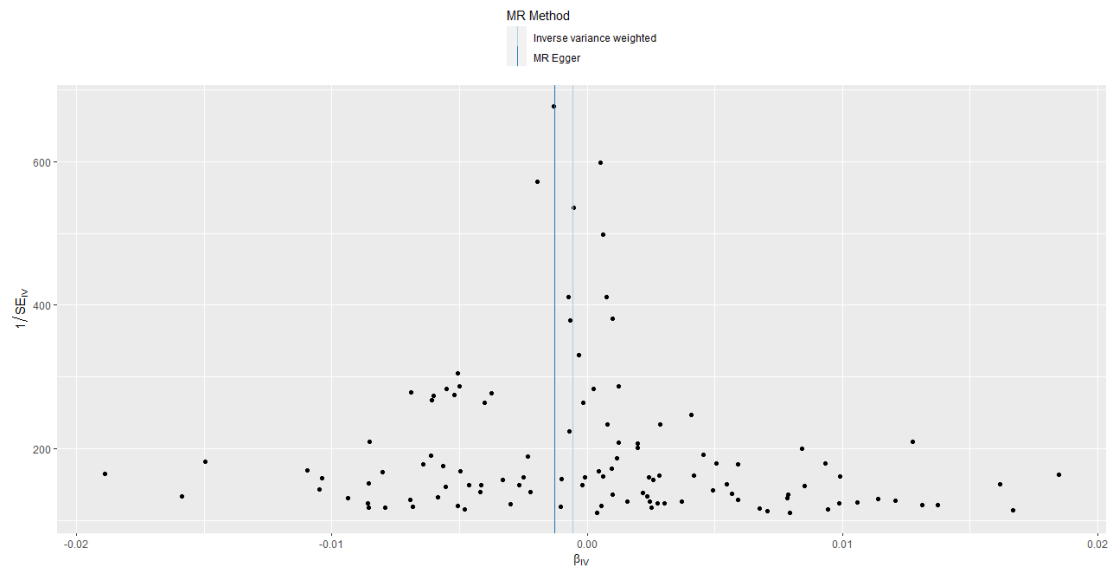

Funnel plot for total cholesterol

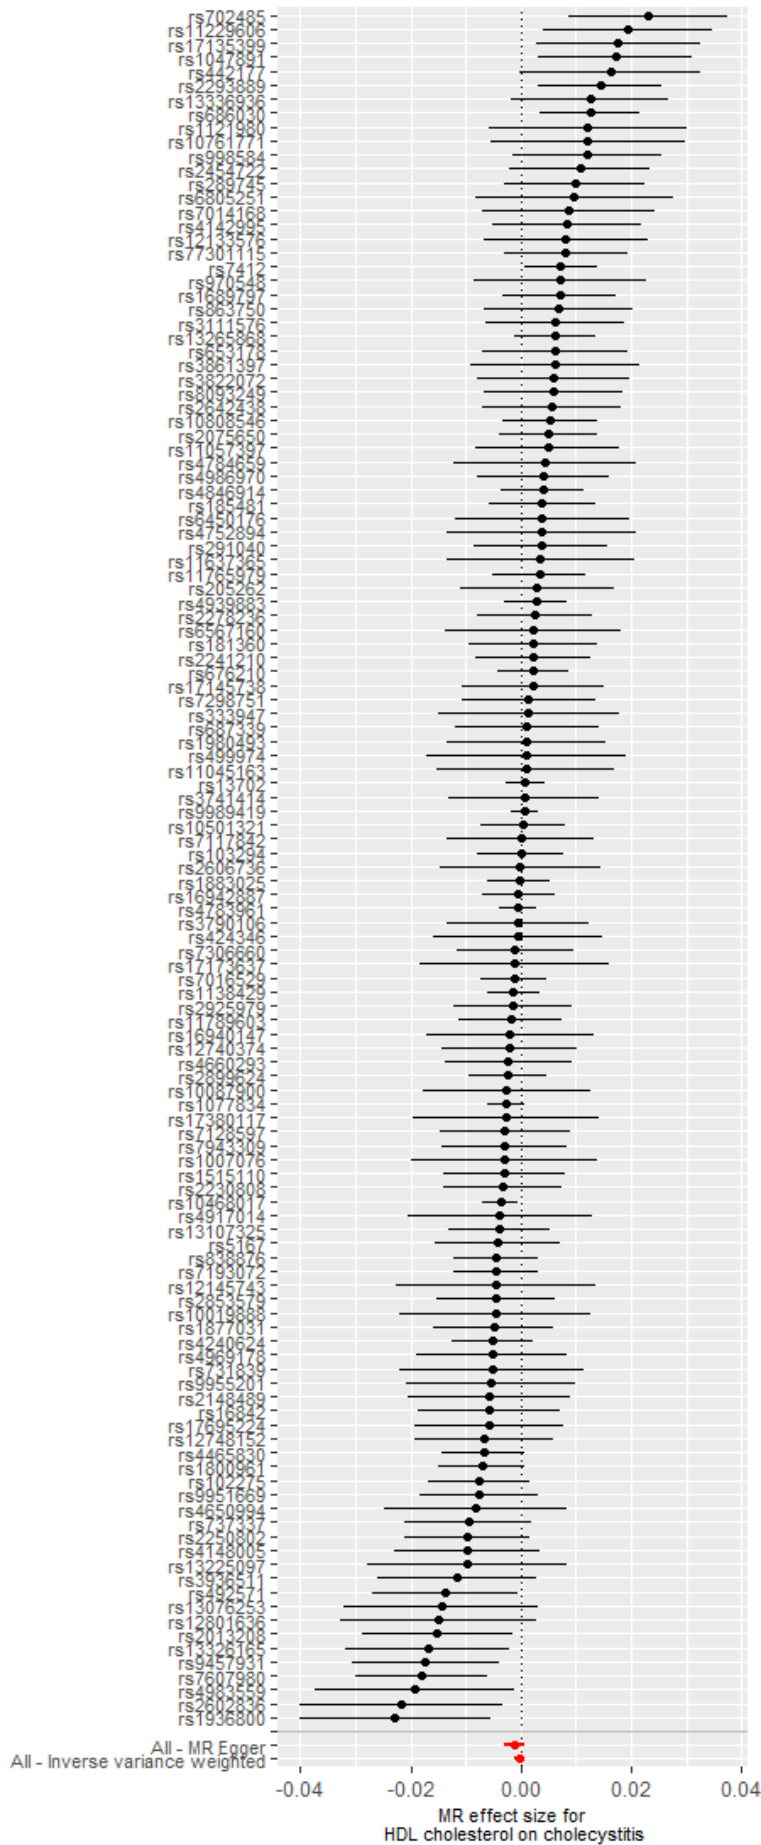

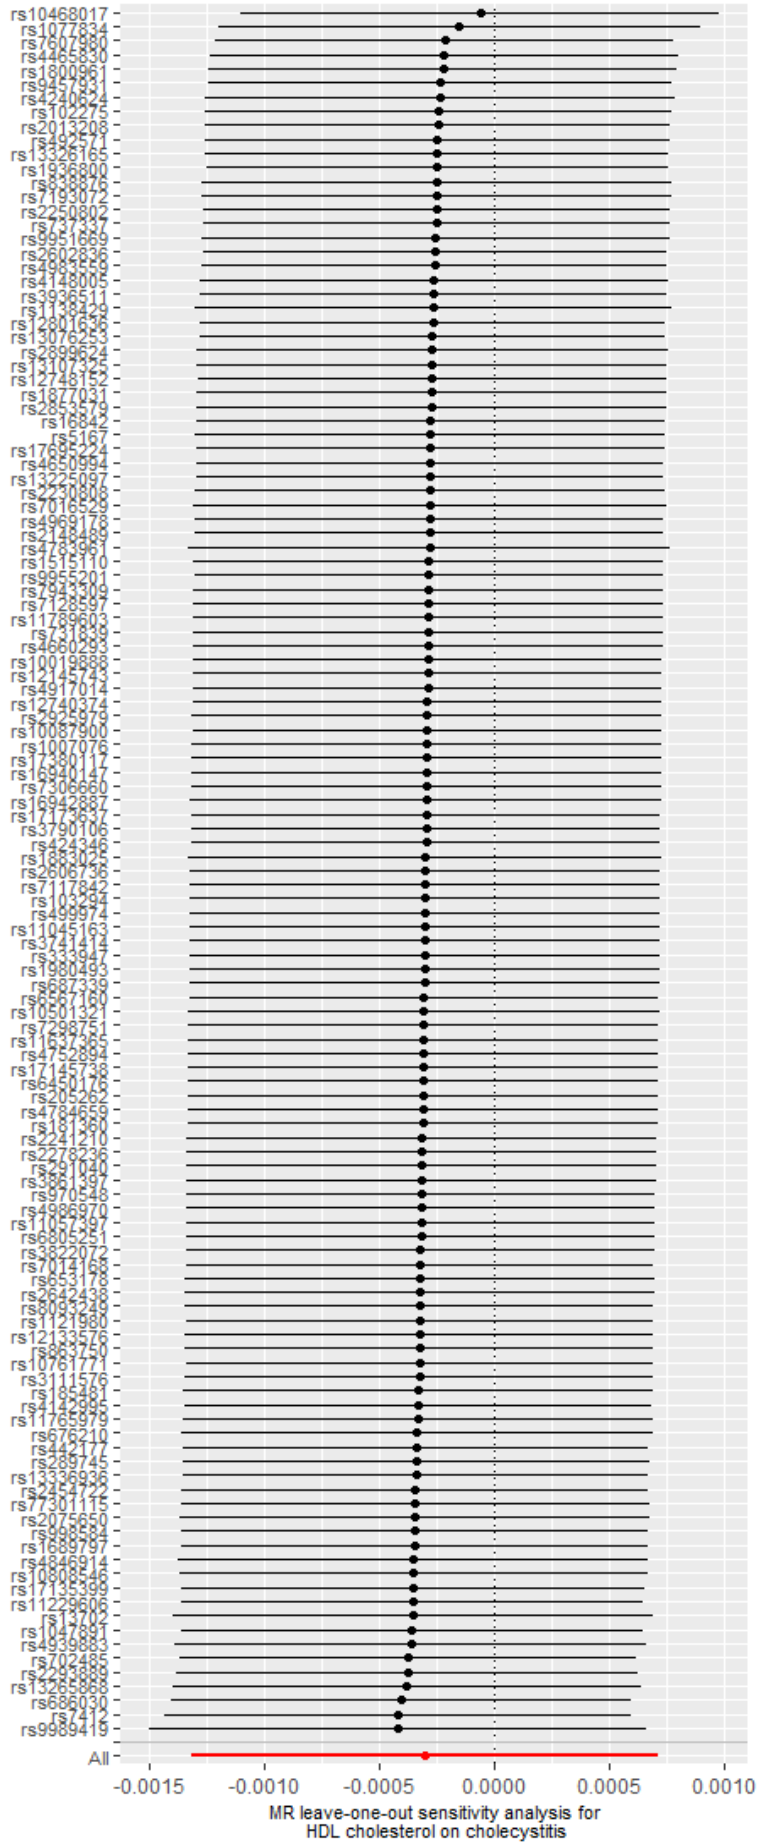

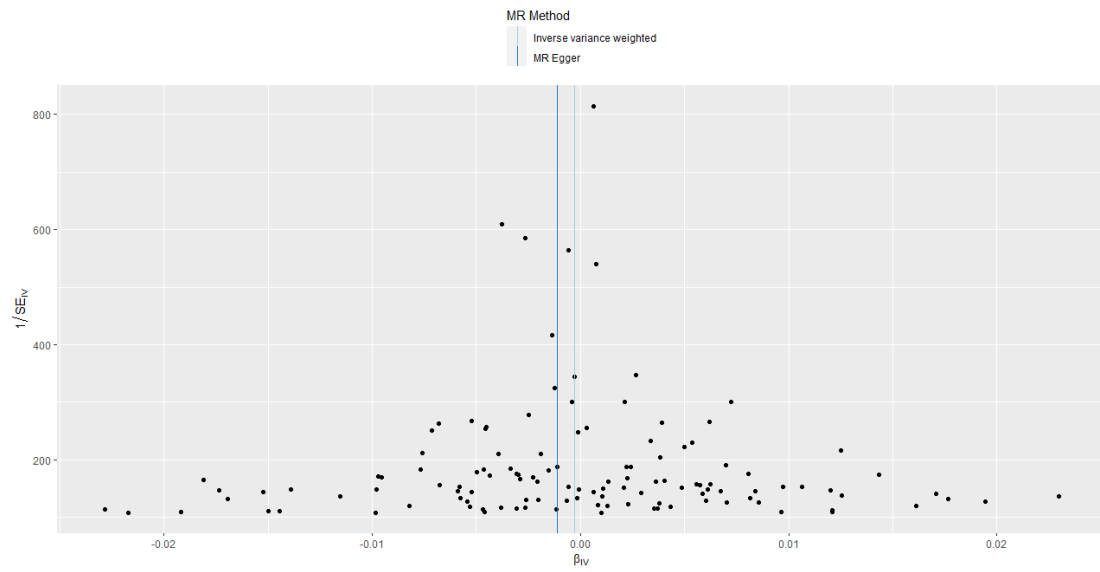

Funnel plot for HDL cholesterol

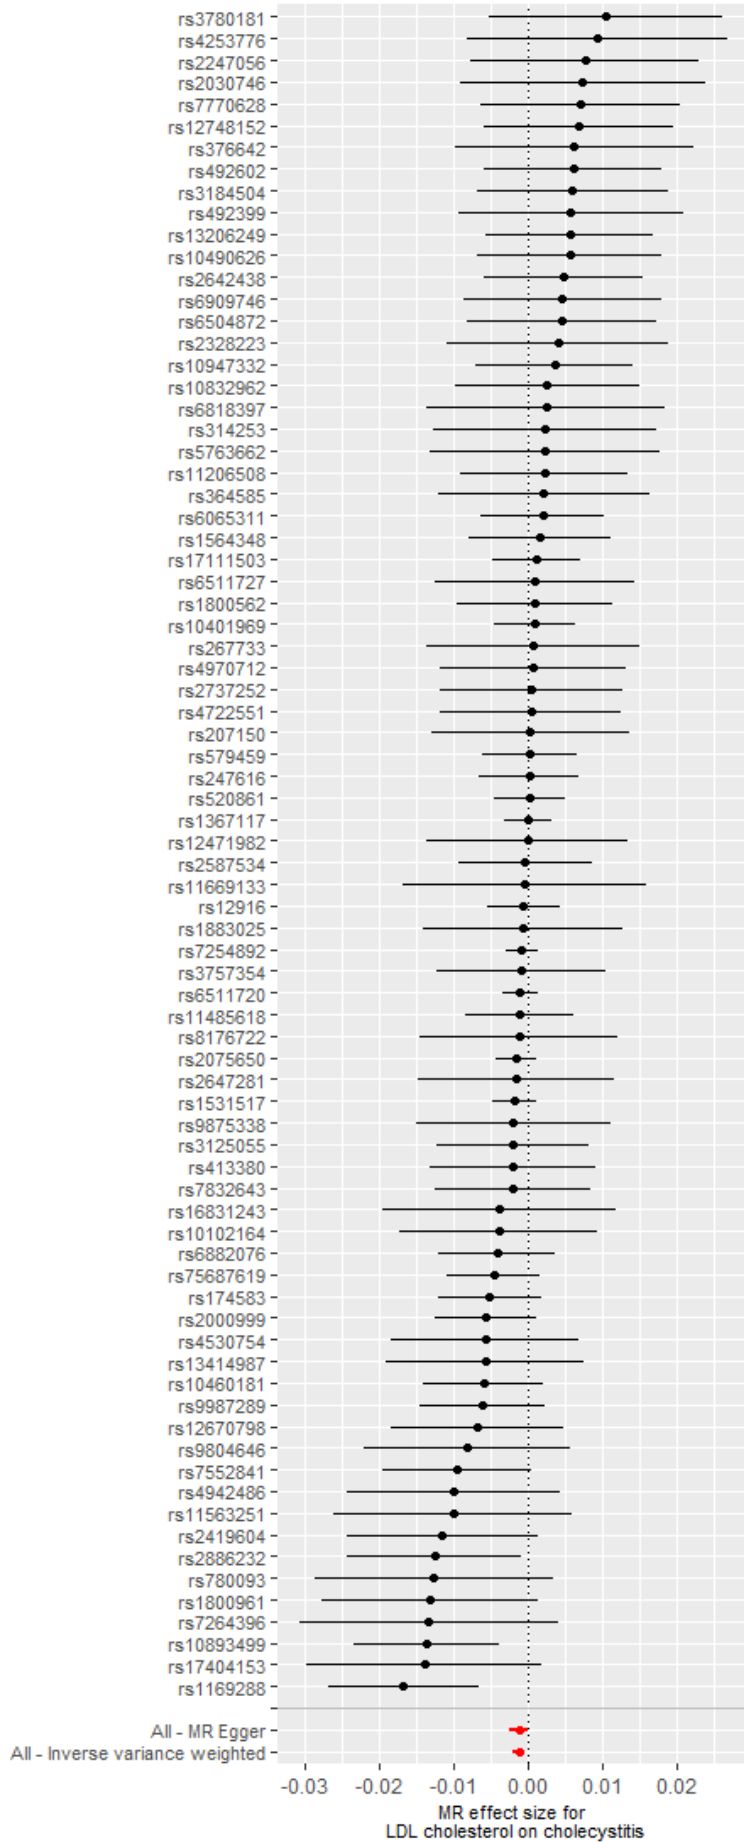

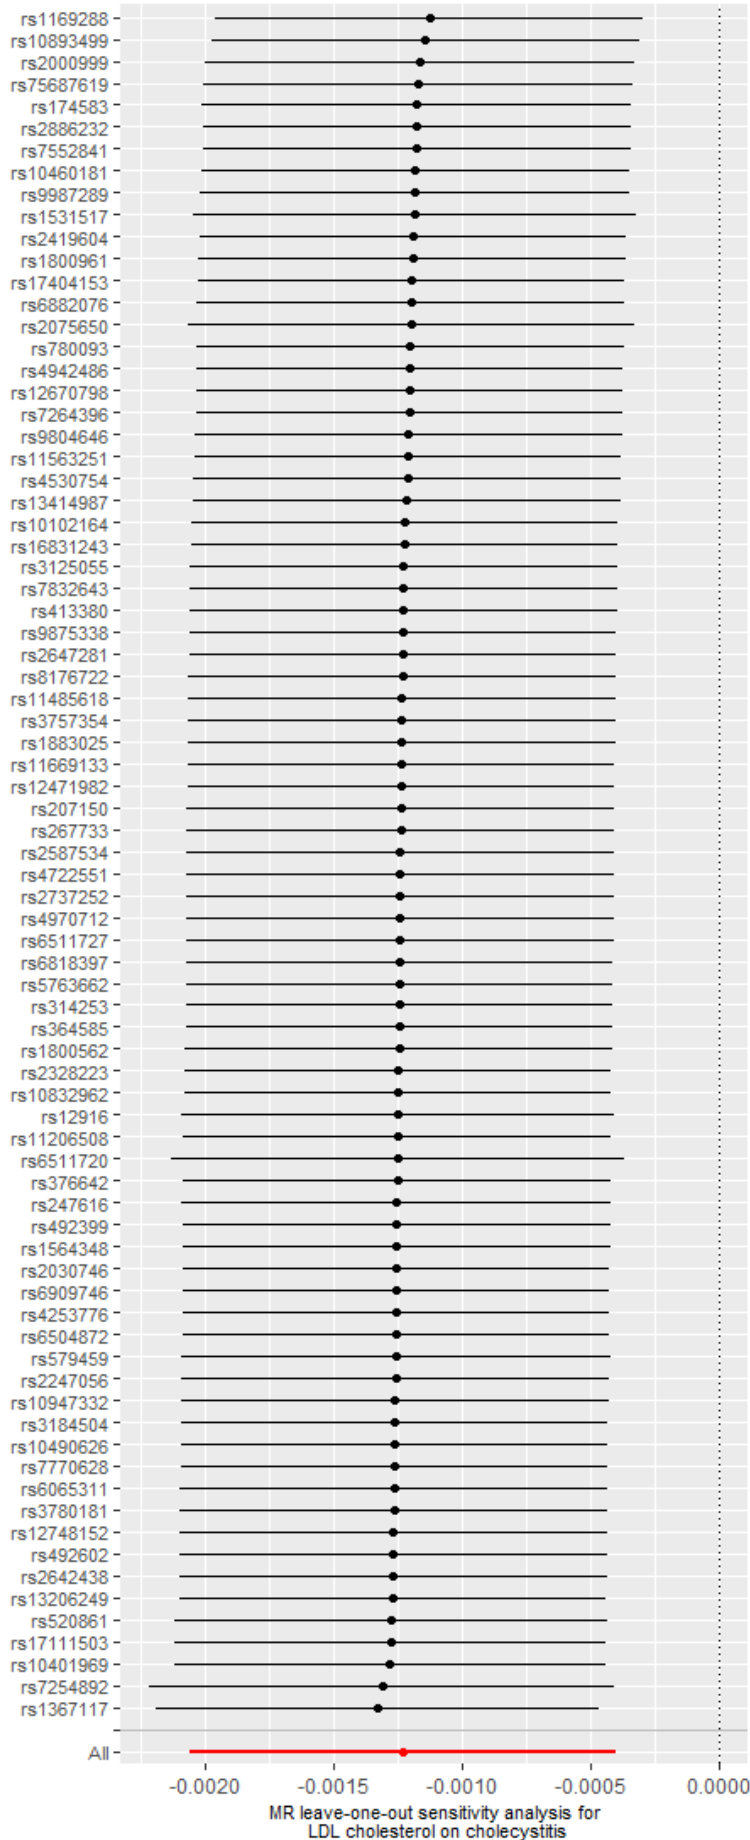



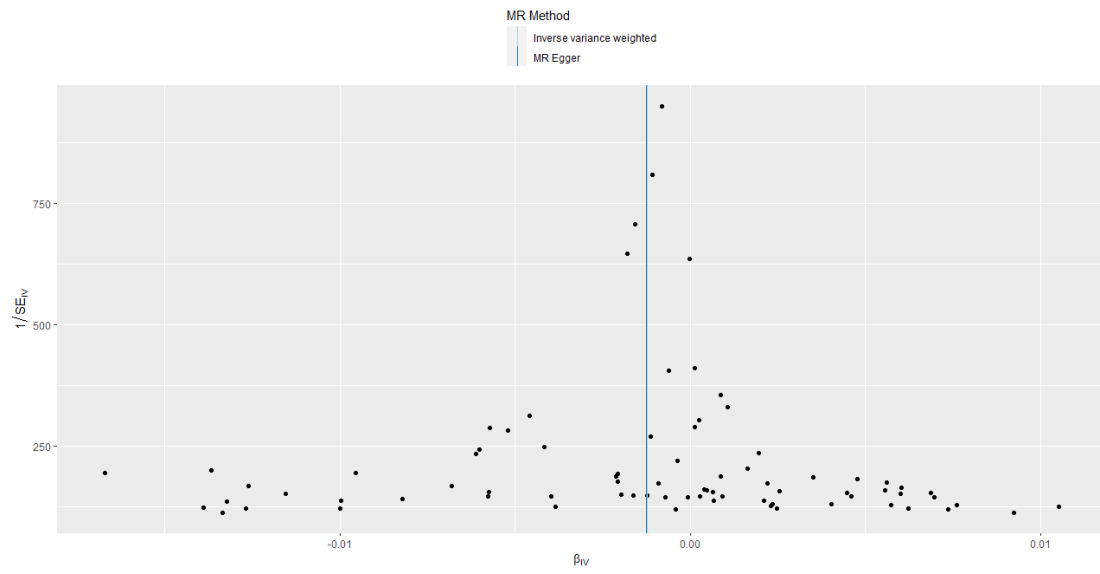

Funnel plot for LDL cholesterol

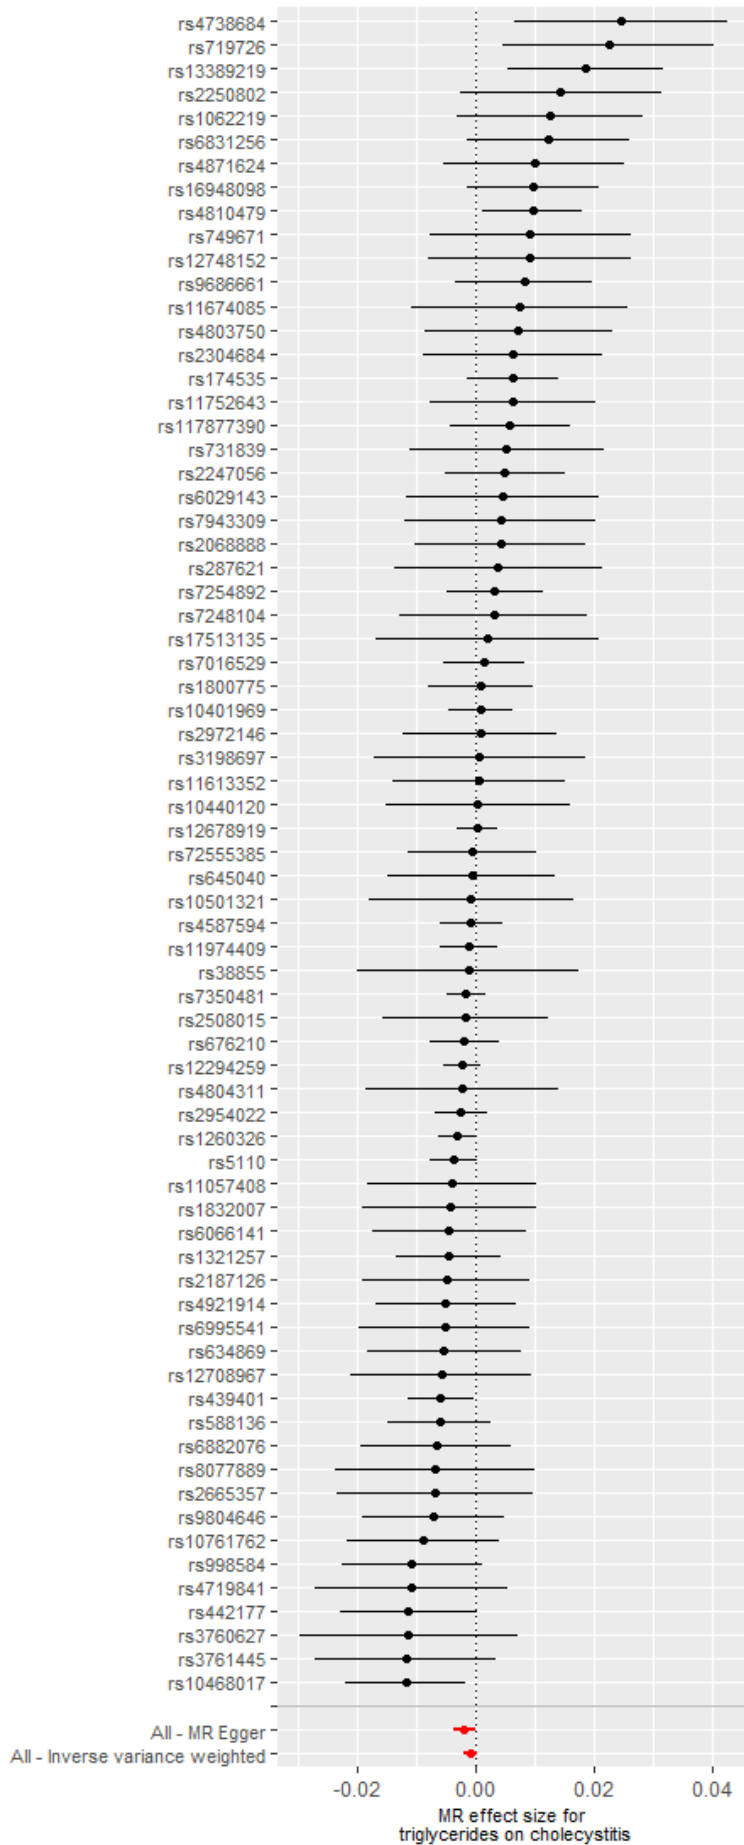

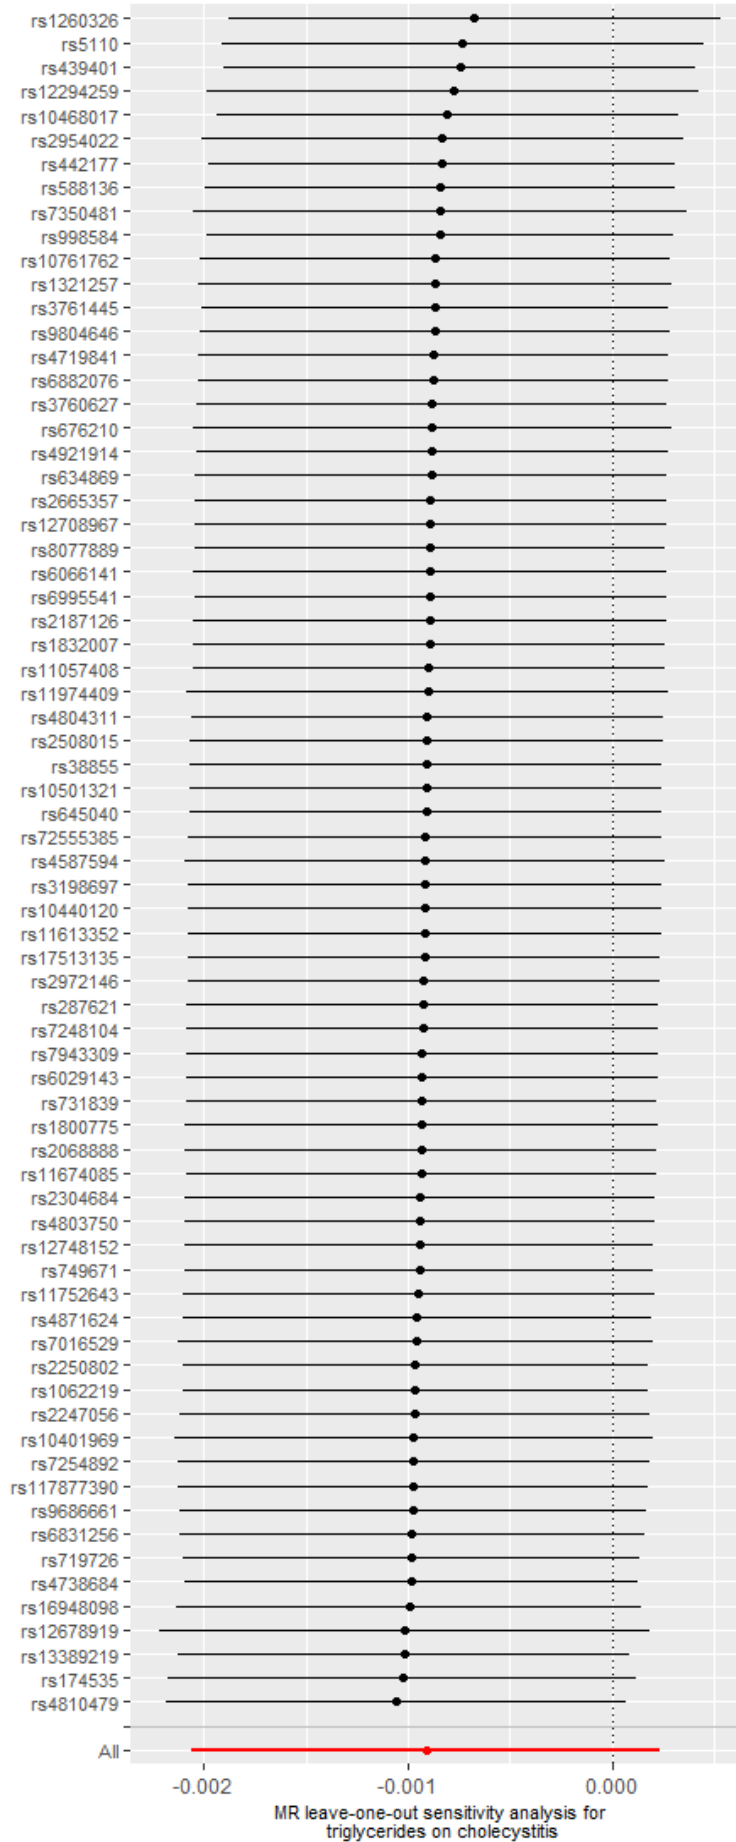

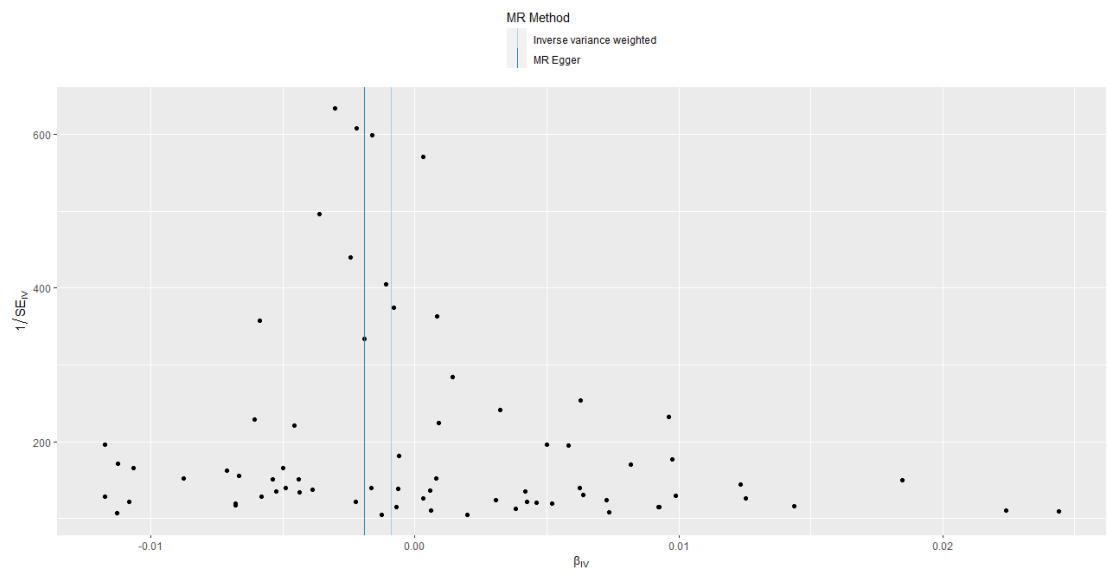

Funnel plot for triglycerides
